# Supplementary material for: Hypogonadism Due to Pituicytoma in an Identical Twin
Source: Atypon-hosted journal article supplement (doi:10.1056/nejmicm067848), 2008-12-24
Supplement: nejm_newnham_2824sa1.pdf [file nejm_newnham_2824sa1.pdf]

## Supplementary Appendix

This appendix has been provided by the authors to give readers additional information about their work.

Supplement to: Newnham HH, Rivera-Woll LM. Hypogonadism due to pituicytoma in an identical twin. *N Engl J Med* 2008;359:2824.

# Pituicytoma, normal twin MRI

H. Newnham & L. Rivera-Woll

NEJM Images in Clinical Medicine

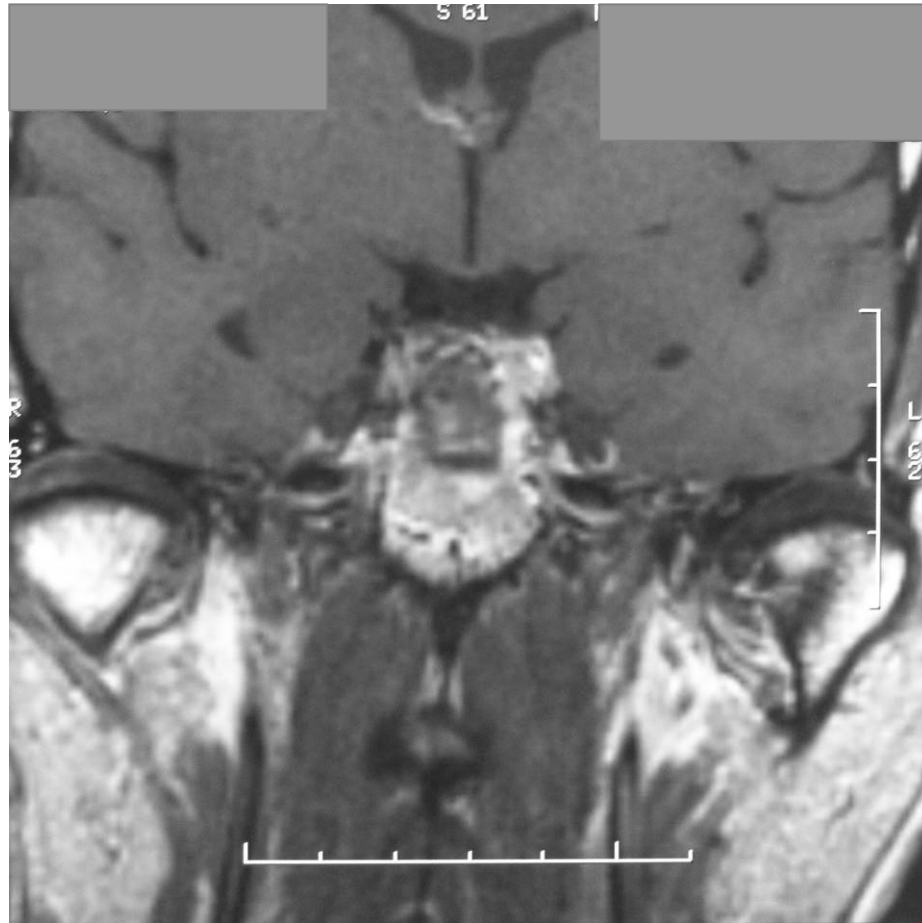

Normal twin coronal MRI (corresponds to image B of affected twin)

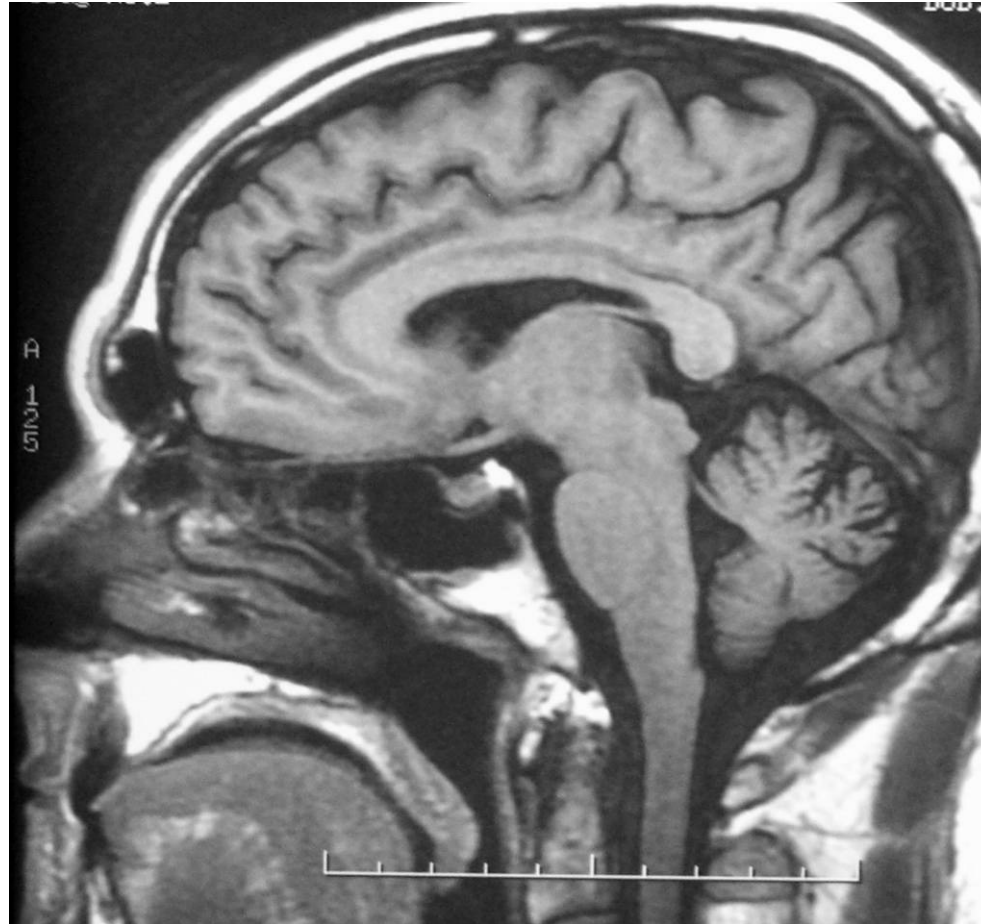

Normal twin sagittal MRI (corresponds to image C of affected twin)
